# Supplementary material for: Phylogenetic relationships among Staphylococcus species and refinement of cluster groups based on multilocus data
Source: PubMed Central journal article supplement (PMC3464590; doi:10.1186/1471-2148-12-171), 2012-09-06
Supplement: 1471-2148-12-171-S1.pdf [file 1471-2148-12-171-S1.pdf]

**Supplementary Table S1. GenBank accession numbers for 16S rDNA, *dnaJ*, *rpoB*, and *tuf* gene fragments analyzed in this study.**

| No. | <i>Staphylococcus</i> Species    | Subspecies             | <sup>a</sup> Strain | <sup>b</sup> Genes |             |             |            |
|-----|----------------------------------|------------------------|---------------------|--------------------|-------------|-------------|------------|
|     |                                  |                        |                     | <i>16S</i>         | <i>dnaJ</i> | <i>rpoB</i> | <i>tuf</i> |
| 1   | <i>S. agnetis</i>                |                        | DSM 23656           | HM484980.1         | N/A         | HM484993.1  | HM485006.1 |
| 2   | <i>S. arlettae</i>               |                        | ATCC 43957          | AB009933.1         | AB234056.1  | AF325874.1  | EU652781.1 |
| 3   | <i>S. aureus</i>                 | <i>aureus</i>          | ATCC 12600          | D83357.1           | AB234058.1  | N/A         | AB472826.1 |
| 4   |                                  | <i>anaerobius</i>      | ATCC 35844          | D83355.1           | AB234057.1  | AF325894.1  | HM352930.1 |
| 5   | <i>S. auricularis</i>            |                        | ATCC 33753          | D83358.1           | AB234059.1  | AF325889.1  | EU652784.1 |
| 6   | <i>S. capitis</i>                | <i>capitis</i>         | ATCC 27840          | L37599.1           | AB234060.1  | AF325885.1  | AF298798.1 |
| 7   |                                  | <i>urealyticus</i>     | ATCC 43926          | AB009937.1         | AB234061.1  | DQ120729.1  | EU652786.1 |
| 8   | <i>S. caprae</i>                 |                        | ATCC 35538          | AB009935.1         | AB234062.1  | AF325896.1  | EU652787.1 |
| 9   | <i>S. carnosus</i>               | <i>carnosus</i>        | ATCC 51365          | AB009934.1         | AB234063.1  | AF325880.1  | EU652788.1 |
| 10  |                                  | <i>utilis</i>          | DSM 11676           | AB233329.1         | AB234064.1  | DQ120730.1  | EU652789.1 |
| 11  | <i>S. chromogenes</i>            |                        | ATCC 43764          | D83360.1           | AB234065.1  | AF325892.1  | EU652790.1 |
| 12  | <i>S. cohnii</i>                 | <i>cohnii</i>          | ATCC 29974          | D83361.1           | AB234066.1  | AF325893.1  | EU652791.1 |
| 13  |                                  | <i>urealyticus</i>     | ATCC 49330          | AB009936.1         | AB234067.1  | DQ120732.1  | HM352939.1 |
| 14  | <i>S. condimenti</i>             |                        | DSM 11674           | Y15750.1           | AB234068.1  | DQ120733.1  | EU652792.1 |
| 15  | <i>S. delphini</i>               |                        | ATCC 49171          | AB009938.1         | AB234319.1  | DQ120735.1  | EU157611.1 |
| 16  | <i>S. devriesei</i>              |                        | CCUG 58238          | FJ389206.1         | FJ907454.1  | FJ389232.1  | FJ389248.1 |
| 17  | <i>S. epidermidis</i>            |                        | ATCC 14990          | D83363.1           | AB234069.1  | AF325872.1  | AF298800.1 |
| 18  | <i>S. equorum</i>                | <i>equorum</i>         | ATCC 43958          | AB009939.1         | AB234070.1  | AF325882.1  | EU652795.1 |
| 19  |                                  | <i>linens</i>          | DSM 15097           | AF527483.1         | EU652838.1  | DQ120736.1  | EU652796.1 |
| 20  | <i>S. felis</i>                  |                        | ATCC 49168          | D83364.1           | AB234071.1  | AF325878.1  | EU652797.1 |
| 21  | <i>S. fleurettii</i>             |                        | ATCC BAA274         | AB233330.1         | AB234072.1  | DQ120737.1  | HM352961.1 |
| 22  | <i>S. gallinarum</i>             |                        | ATCC 35539          | D83366.1           | AB234073.1  | AF325890.1  | EU652799.1 |
| 23  | <i>S. haemolyticus</i>           |                        | ATCC 29970          | L37600.1           | AB234074.1  | AF325888.1  | HM352923.1 |
| 24  | <i>S. hominis</i>                | <i>hominis</i>         | ATCC 27844          | L37601.1           | AB234075.1  | AF325875.1  | EU652801.1 |
| 25  |                                  | <i>novobiosepticus</i> | ATCC 700236         | AB233326.1         | AB234076.1  | DQ120738.1  | EU652802.1 |
| 26  | <i>S. hyicus</i>                 |                        | ATCC 11249          | D83368.1           | AB234077.1  | AF325876.1  | EU571080.1 |
| 27  | <i>S. intermedius</i>            |                        | ATCC 29663          | D83369.1           | AB234078.1  | AF325869.1  | EU652804.1 |
| 28  | <i>S. kloosii</i>                |                        | ATCC 43959          | AB009940.1         | AB234079.1  | AF325891.1  | EU652813.1 |
| 29  | <i>S. lentus</i>                 |                        | ATCC 29070          | D83370.1           | AB234080.1  | AY036973.1  | HM352944.1 |
| 30  | <i>S. lugdunensis</i>            |                        | ATCC 43809          | AB009941.1         | AB234081.1  | AF325870.1  | AF298803.1 |
| 31  | <i>S. lutrae</i>                 |                        | ATCC 700373         | AB233333.1         | AB234082.1  | DQ120739.1  | EU652806.1 |
| 32  | <i>S. massiliensis</i>           |                        | CCUG 55927          | EU707796.1         | EU652841.1  | N/A         | EU652827.1 |
| 33  | <i>S. microti</i>                |                        | DSM 22147           | EU888120.1         | FN433124.1  | EU888121.1  | N/A        |
| 34  | <i>S. muscae</i>                 |                        | ATCC 49910          | S83566.1           | AB234083.1  | AF325884.1  | EU652807.1 |
| 35  | <i>S. nepalensis</i>             |                        | DSM 15150           | AJ517414.1         | GQ222247.1  | GQ222237.1  | EU652808.1 |
| 36  | <i>S. pasteurii</i>              |                        | ATCC 51129          | AB009944.1         | AB234084.1  | DQ120742.1  | EU652809.1 |
| 37  | <i>S. pettenkoferi</i>           |                        | DSM 19554           | DQ538517.1         | EU652829.1  | DQ120744.1  | EU652810.1 |
| 38  | <i>S. piscifermentans</i>        |                        | ATCC 51136          | AF041359.1         | AB234085.1  | DQ120745.1  | HM352955.1 |
| 39  | <i>S. pseudintermedius</i>       |                        | CCUG 22219          | AJ780976.1         | EU652840.1  | AM921786.1  | EU157680.1 |
| 40  | <sup>c</sup> <i>S. pulvereri</i> |                        | ATCC 51698          | AB009942.1         | AB234086.1  | AF325879.1  | N/A        |
| 41  | <i>S. rostri</i>                 |                        | DSM 21968           | FM242137.1         | FM244714.1  | FM242139.1  | N/A        |
| 42  | <i>S. saccharolyticus</i>        |                        | ATCC 14953          | L37602.1           | AB234087.1  | AF325871.1  | EU652814.1 |

|    |                         |                      |             |            |            |            |            |
|----|-------------------------|----------------------|-------------|------------|------------|------------|------------|
| 43 | <i>S. saprophyticus</i> | <i>bovis</i>         | DSM 18669   | AB233327.1 | AB234088.1 | DQ120746.1 | HM352934.1 |
| 44 |                         | <i>saprophyticus</i> | ATCC 15305  | D83371.2   | AB234089.1 | EF173662.1 | EU571085.1 |
| 45 | <i>S. schleiferi</i>    | <i>schleiferi</i>    | ATCC 43808  | D83372.1   | AB234321.1 | AF325886.1 | EU652818.1 |
| 46 |                         | <i>coagulans</i>     | ATCC 49545  | AB009945.1 | AB234320.1 | DQ120747.1 | EU571086.1 |
| 47 | <i>S. sciuri</i>        | <i>carnaticus</i>    | ATCC 700058 | AB233331.1 | AB234322.1 | DQ120748.1 | EU652819.1 |
| 48 |                         | <i>rodentium</i>     | ATCC 700061 | AB233332.1 | AB234323.1 | DQ120749.1 | EU652820.1 |
| 49 |                         | <i>sciuri</i>        | ATCC 29062  | AJ421446.1 | AB234324.1 | HM146323.1 | HM352947.1 |
| 50 | <i>S. simiae</i>        |                      | DSM 17636   | AY727530.2 | GQ222248.1 | EU888127.1 | HM352931.1 |
| 51 | <i>S. simulans</i>      |                      | ATCC 27848  | D83373.1   | AB234325.1 | AF325877.1 | EU571090.1 |
| 52 | <i>S. stepanovicii</i>  |                      | CCM 7717    | GQ222244.1 | GQ222254.1 | FJ906724.1 | N/A        |
| 53 | <i>S. succinus</i>      | <i>succinus</i>      | ATCC 700337 | AF004220.1 | AB234326.1 | DQ120751.1 | EU652824.1 |
| 54 |                         | <i>casei</i>         | DSM 15096   | AJ320272.1 | EU652830.1 | DQ120750.1 | EU652823.1 |
| 55 | <i>S. vitulinus</i>     |                      | ATCC 51145  | AB009946.1 | AB234327.1 | DQ120752.1 | EU652825.1 |
| 56 | <i>S. warneri</i>       |                      | ATCC 27836  | L37603.1   | AB234328.1 | AF325887.1 | AF298806.1 |
| 57 | <i>S. xylosus</i>       |                      | ATCC 29971  | D83374.1   | AB234329.1 | AF325883.1 | HM352950.1 |

<sup>a</sup>All are type strains; DSM, German Collection of Microorganisms and Cell Cultures; ATCC, American Type Culture Collection; CCUG, Culture Collection, University of Gothenburg; CCM, Czechoslovak Collection of Microorganisms.

<sup>b</sup>N/A, no sequence analyzed. Numbers indicated are GenBank accession numbers.

<sup>c</sup>Reclassified as a later synonym of *S. vitulinus* [1].

#### Reference:

1. Svec P, Vancanneyt M, Sedlacek I, Engelbeen K, Stetina V, Swings J, Petras P: **Reclassification of *Staphylococcus pulvereri* Zakrzewska-Czerwinska et al. 1995 as a later synonym of *Staphylococcus vitulinus* Webster et al. 1994.** *Int J Syst Evol Microbiol* 2004, **54**:2213-2215.
