# Supplementary material for: Phylogenetic relationships among Staphylococcus species and refinement of cluster groups based on multilocus data
Source: PubMed Central journal article supplement (PMC3464590; doi:10.1186/1471-2148-12-171), 2012-09-06
Supplement: 1471-2148-12-171-S2.pdf [file 1471-2148-12-171-S2.pdf]

**Supplementary Table S2. Evolutionary models for each partition were chosen based on AIC using jModelTest.**

| Partition                             | Model          |
|---------------------------------------|----------------|
| All gene fragments                    | GTR + $\Gamma$ |
| 16S, whole fragment                   | K80 + $\Gamma$ |
| 16S, stem nucleotides                 | SYM + $\Gamma$ |
| 16S, loop nucleotides                 | GTR + $\Gamma$ |
| All protein coding gene fragments     | GTR + $\Gamma$ |
| <i>dnaJ</i> , whole fragment          | GTR + $\Gamma$ |
| <i>dnaJ</i> , codon positions 1 and 2 | GTR + $\Gamma$ |
| <i>dnaJ</i> , codon position 1        | SYM + $\Gamma$ |
| <i>dnaJ</i> , codon position 2        | HKY + $\Gamma$ |
| <i>dnaJ</i> , codon position 3        | GTR + $\Gamma$ |
| <i>rpoB</i> , , whole fragment        | SYM + $\Gamma$ |
| <i>rpoB</i> , codon positions 1 and 2 | SYM + $\Gamma$ |
| <i>rpoB</i> , codon position 1        | GTR + $\Gamma$ |
| <i>rpoB</i> , codon position 2        | SYM + $\Gamma$ |
| <i>rpoB</i> , codon position 3        | GTR + $\Gamma$ |
| <i>tuf</i> , whole fragment           | GTR + $\Gamma$ |
| <i>tuf</i> , codon positions 1 and 2  | JC + $\Gamma$  |
| <i>tuf</i> , codon position 1         | GTR + $\Gamma$ |
| <i>tuf</i> , codon position 2         | GTR + $\Gamma$ |
| <i>tuf</i> , codon position 3         | GTR + $\Gamma$ |
