# Supplementary material for: Phylogenetic relationships among Staphylococcus species and refinement of cluster groups based on multilocus data
Source: PubMed Central journal article supplement (PMC3464590; doi:10.1186/1471-2148-12-171), 2012-09-06
Supplement: 1471-2148-12-171-S5.pdf [file 1471-2148-12-171-S5.pdf]

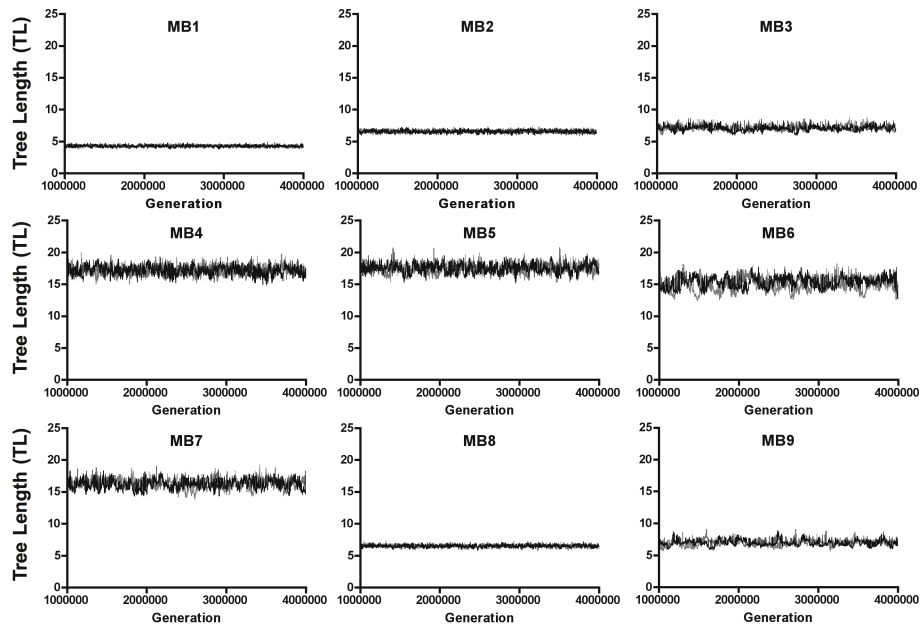

**Supplementary Figure S3. Tree length (TL) analysis indicates that overparameterization may be occurring within more highly partitioned datasets.**

Shown are post-burnin generational TL estimates for partitioning strategies assessed in this study. Note that as the complexity of partitioning increases evidence of increased TL and failed convergence is observed.
