# Supplementary material for: Phylogenetic relationships among Staphylococcus species and refinement of cluster groups based on multilocus data
Source: PubMed Central journal article supplement (PMC3464590; doi:10.1186/1471-2148-12-171), 2012-09-06
Supplement: 1471-2148-12-171-S6.pdf [file 1471-2148-12-171-S6.pdf]

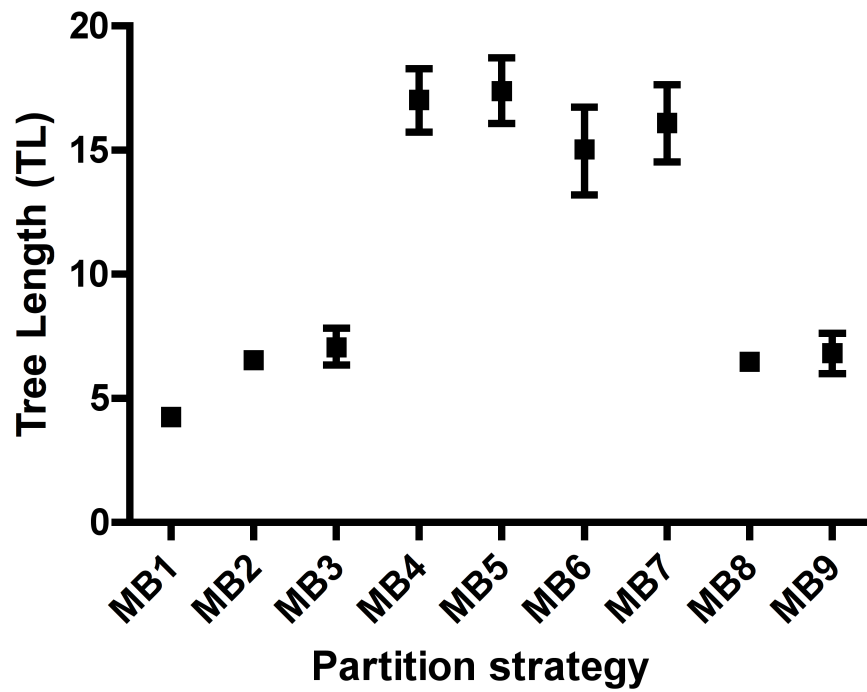

**Supplementary Figure S4. Model partitioning increases the mean tree length (TL) and run variance.** Shown is a box plot indicating the mean TL and 95% confidence interval among partitioning strategies.
